# Supplementary material for: Differential responses of the seed germination of three functional groups to low temperature and darkness in a typical steppe, Northern China
Source: PeerJ. 2022 Dec 1;10:e14485. doi: 10.7717/peerj.14485 (PMC9744151; doi:10.7717/peerj.14485)
Supplement: Supplemental Information 1 [file peerj-10-14485-s001.xlsx]

## Sheet: Sheet1
Treatment	treatment	PFG	Species	Light	Temperature	FGP	GF	GD	GS
C	High temperature / Photoperiod	PF	Tm	1	1	55	15	7	2
C	High temperature / Photoperiod	PF	Tm	1	1	75	25	10	2
C	High temperature / Photoperiod	PF	Tm	1	1	65	20	8	2
C	High temperature / Photoperiod	PF	Pt	1	1	50	20	8	7
C	High temperature / Photoperiod	PF	Pt	1	1	15	5	5	8
C	High temperature / Photoperiod	PF	Pt	1	1	15	5	8	8
C	High temperature / Photoperiod	PG	St	1	1	25	10	10	8
C	High temperature / Photoperiod	PG	St	1	1	40	10	10	8
C	High temperature / Photoperiod	PG	St	1	1	50	10	10	5
C	High temperature / Photoperiod	PF	At	1	1	100	30	11	4
C	High temperature / Photoperiod	PF	At	1	1	100	50	7	5
C	High temperature / Photoperiod	PF	At	1	1	95	20	9	4
C	High temperature / Photoperiod	PG	Ac	1	1	30	10	9	4
C	High temperature / Photoperiod	PG	Ac	1	1	40	15	10	4
C	High temperature / Photoperiod	PG	Ac	1	1	40	20	7	4
C	High temperature / Photoperiod	PG	Pc	1	1	35	15	4	5
C	High temperature / Photoperiod	PG	Pc	1	1	10	10	1	5
C	High temperature / Photoperiod	PG	Pc	1	1	20	15	3	5
C	High temperature / Photoperiod	PF	Pa	1	1	70	30	15	3
C	High temperature / Photoperiod	PF	Pa	1	1	60	20	12	3
C	High temperature / Photoperiod	PF	Pa	1	1	70	30	6	3
C	High temperature / Photoperiod	PF	Pb	1	1	15	5	5	10
C	High temperature / Photoperiod	PF	Pb	1	1	5	5	1	12
C	High temperature / Photoperiod	PF	Pb	1	1	15	5	7	10
C	High temperature / Photoperiod	PG	Lc	1	1	40	15	7	6
C	High temperature / Photoperiod	PG	Lc	1	1	15	5	8	5
C	High temperature / Photoperiod	PG	Lc	1	1	15	5	8	6
C	High temperature / Photoperiod	PF	Ld	1	1	0	0	0	30
C	High temperature / Photoperiod	PF	Ld	1	1	5	5	1	2
C	High temperature / Photoperiod	PF	Ld	1	1	0	0	0	30
C	High temperature / Photoperiod	PF	Af	1	1	100	45	4	2
C	High temperature / Photoperiod	PF	Af	1	1	90	75	3	3
C	High temperature / Photoperiod	PF	Af	1	1	90	60	6	3
C	High temperature / Photoperiod	AB	As	1	1	95	65	5	3
C	High temperature / Photoperiod	AB	As	1	1	95	40	5	2
C	High temperature / Photoperiod	AB	As	1	1	95	45	6	2
C	High temperature / Photoperiod	AB	Dd	1	1	25	10	5	4
C	High temperature / Photoperiod	AB	Dd	1	1	25	10	3	4
C	High temperature / Photoperiod	AB	Dd	1	1	40	20	8	4
C	High temperature / Photoperiod	PF	Mr	1	1	15	10	3	8
C	High temperature / Photoperiod	PF	Mr	1	1	10	5	6	7
C	High temperature / Photoperiod	PF	Mr	1	1	20	5	7	7
C	High temperature / Photoperiod	PF	Tp	1	1	80	20	7	9
C	High temperature / Photoperiod	PF	Tp	1	1	100	30	7	9
C	High temperature / Photoperiod	PF	Tp	1	1	100	25	6	9
C	High temperature / Photoperiod	AB	Ce	1	1	60	30	4	4
C	High temperature / Photoperiod	AB	Ce	1	1	45	15	5	4
C	High temperature / Photoperiod	AB	Ce	1	1	60	55	2	4
D	High temperature / Darkness	PF	Tm	0	1	55	15	10	2
D	High temperature / Darkness	PF	Tm	0	1	75	15	13	2
D	High temperature / Darkness	PF	Tm	0	1	50	20	13	2
D	High temperature / Darkness	PF	Pt	0	1	25	5	7	10
D	High temperature / Darkness	PF	Pt	0	1	5	5	1	10
D	High temperature / Darkness	PF	Pt	0	1	20	5	4	11
D	High temperature / Darkness	PG	St	0	1	65	20	8	2
D	High temperature / Darkness	PG	St	0	1	80	25	6	2
D	High temperature / Darkness	PG	St	0	1	65	20	8	2
D	High temperature / Darkness	PF	At	0	1	80	25	12	2
D	High temperature / Darkness	PF	At	0	1	80	25	10	2
D	High temperature / Darkness	PF	At	0	1	75	20	11	2
D	High temperature / Darkness	PG	Ac	0	1	65	25	5	3
D	High temperature / Darkness	PG	Ac	0	1	45	15	6	3
D	High temperature / Darkness	PG	Ac	0	1	35	10	8	3
D	High temperature / Darkness	PG	Pc	0	1	20	5	6	3
D	High temperature / Darkness	PG	Pc	0	1	20	10	6	3
D	High temperature / Darkness	PG	Pc	0	1	5	5	1	4
D	High temperature / Darkness	PF	Pa	0	1	50	20	7	3
D	High temperature / Darkness	PF	Pa	0	1	90	35	9	3
D	High temperature / Darkness	PF	Pa	0	1	100	20	9	3
D	High temperature / Darkness	PF	Pb	0	1	30	10	5	7
D	High temperature / Darkness	PF	Pb	0	1	10	5	4	9
D	High temperature / Darkness	PF	Pb	0	1	5	5	1	16
D	High temperature / Darkness	PG	Lc	0	1	0	0	0	30
D	High temperature / Darkness	PG	Lc	0	1	5	5	1	5
D	High temperature / Darkness	PG	Lc	0	1	5	5	1	6
D	High temperature / Darkness	PF	Ld	0	1	10	5	4	4
D	High temperature / Darkness	PF	Ld	0	1	5	5	1	3
D	High temperature / Darkness	PF	Ld	0	1	0	0	0	30
D	High temperature / Darkness	PF	Af	0	1	75	30	3	2
D	High temperature / Darkness	PF	Af	0	1	100	35	8	2
D	High temperature / Darkness	PF	Af	0	1	80	50	8	2
D	High temperature / Darkness	AB	As	0	1	80	35	5	3
D	High temperature / Darkness	AB	As	0	1	100	55	13	3
D	High temperature / Darkness	AB	As	0	1	75	30	5	3
D	High temperature / Darkness	AB	Dd	0	1	10	10	1	4
D	High temperature / Darkness	AB	Dd	0	1	0	0	0	30
D	High temperature / Darkness	AB	Dd	0	1	25	10	4	2
D	High temperature / Darkness	PF	Mr	0	1	10	5	6	8
D	High temperature / Darkness	PF	Mr	0	1	10	5	15	6
D	High temperature / Darkness	PF	Mr	0	1	10	10	1	6
D	High temperature / Darkness	PF	Tp	0	1	80	20	5	9
D	High temperature / Darkness	PF	Tp	0	1	95	30	8	9
D	High temperature / Darkness	PF	Tp	0	1	90	30	8	9
D	High temperature / Darkness	AB	Ce	0	1	50	35	4	4
D	High temperature / Darkness	AB	Ce	0	1	90	45	4	4
D	High temperature / Darkness	AB	Ce	0	1	40	25	6	4
L	Low temperature / Photoperiod	PF	Tm	1	0	50	20	10	18
L	Low temperature / Photoperiod	PF	Tm	1	0	50	20	11	18
L	Low temperature / Photoperiod	PF	Tm	1	0	45	25	9	18
L	Low temperature / Photoperiod	PF	Pt	1	0	35	10	9	24
L	Low temperature / Photoperiod	PF	Pt	1	0	5	5	2	29
L	Low temperature / Photoperiod	PF	Pt	1	0	20	10	5	28
L	Low temperature / Photoperiod	PG	St	1	0	25	10	6	26
L	Low temperature / Photoperiod	PG	St	1	0	25	10	6	26
L	Low temperature / Photoperiod	PG	St	1	0	45	10	9	24
L	Low temperature / Photoperiod	PF	At	1	0	80	15	12	21
L	Low temperature / Photoperiod	PF	At	1	0	50	10	10	21
L	Low temperature / Photoperiod	PF	At	1	0	30	10	8	23
L	Low temperature / Photoperiod	PG	Ac	1	0	20	5	10	22
L	Low temperature / Photoperiod	PG	Ac	1	0	45	10	11	21
L	Low temperature / Photoperiod	PG	Ac	1	0	30	5	10	21
L	Low temperature / Photoperiod	PG	Pc	1	0	10	5	4	23
L	Low temperature / Photoperiod	PG	Pc	1	0	25	5	9	22
L	Low temperature / Photoperiod	PG	Pc	1	0	15	5	6	24
L	Low temperature / Photoperiod	PF	Pa	1	0	100	35	10	20
L	Low temperature / Photoperiod	PF	Pa	1	0	80	35	10	20
L	Low temperature / Photoperiod	PF	Pa	1	0	100	45	10	20
L	Low temperature / Photoperiod	PF	Pb	1	0	0	0	0	30
L	Low temperature / Photoperiod	PF	Pb	1	0	0	0	0	30
L	Low temperature / Photoperiod	PF	Pb	1	0	0	0	0	30
L	Low temperature / Photoperiod	PG	Lc	1	0	0	0	0	30
L	Low temperature / Photoperiod	PG	Lc	1	0	0	0	0	30
L	Low temperature / Photoperiod	PG	Lc	1	0	0	0	0	30
L	Low temperature / Photoperiod	PF	Ld	1	0	0	0	0	30
L	Low temperature / Photoperiod	PF	Ld	1	0	0	0	0	30
L	Low temperature / Photoperiod	PF	Ld	1	0	0	0	0	30
L	Low temperature / Photoperiod	PF	Af	1	0	10	5	4	30
L	Low temperature / Photoperiod	PF	Af	1	0	20	10	19	15
L	Low temperature / Photoperiod	PF	Af	1	0	20	5	15	19
L	Low temperature / Photoperiod	AB	As	1	0	40	15	16	18
L	Low temperature / Photoperiod	AB	As	1	0	30	15	8	19
L	Low temperature / Photoperiod	AB	As	1	0	45	20	9	18
L	Low temperature / Photoperiod	AB	Dd	1	0	0	0	0	30
L	Low temperature / Photoperiod	AB	Dd	1	0	0	0	0	30
L	Low temperature / Photoperiod	AB	Dd	1	0	0	0	0	30
L	Low temperature / Photoperiod	PF	Mr	1	0	0	0	0	30
L	Low temperature / Photoperiod	PF	Mr	1	0	0	0	0	30
L	Low temperature / Photoperiod	PF	Mr	1	0	5	5	1	30
L	Low temperature / Photoperiod	PF	Tp	1	0	0	0	0	30
L	Low temperature / Photoperiod	PF	Tp	1	0	0	0	0	30
L	Low temperature / Photoperiod	PF	Tp	1	0	0	0	0	30
L	Low temperature / Photoperiod	AB	Ce	1	0	0	0	0	30
L	Low temperature / Photoperiod	AB	Ce	1	0	0	0	0	30
L	Low temperature / Photoperiod	AB	Ce	1	0	0	0	0	30
DL	Low temperature / Darkness	PF	Tm	0	0	55	10	12	30
DL	Low temperature / Darkness	PF	Tm	0	0	50	10	11	30
DL	Low temperature / Darkness	PF	Tm	0	0	70	20	10	30
DL	Low temperature / Darkness	PF	Pt	0	0	0	0	0	30
DL	Low temperature / Darkness	PF	Pt	0	0	0	0	0	30
DL	Low temperature / Darkness	PF	Pt	0	0	0	0	0	30
DL	Low temperature / Darkness	PG	St	0	0	20	5	7	30
DL	Low temperature / Darkness	PG	St	0	0	0	0	0	30
DL	Low temperature / Darkness	PG	St	0	0	5	5	1	29
DL	Low temperature / Darkness	PF	At	0	0	30	10	7	21
DL	Low temperature / Darkness	PF	At	0	0	10	5	6	26
DL	Low temperature / Darkness	PF	At	0	0	10	5	5	25
DL	Low temperature / Darkness	PG	Ac	0	0	15	5	5	26
DL	Low temperature / Darkness	PG	Ac	0	0	20	5	6	25
DL	Low temperature / Darkness	PG	Ac	0	0	15	5	4	26
DL	Low temperature / Darkness	PG	Pc	0	0	0	0	0	30
DL	Low temperature / Darkness	PG	Pc	0	0	0	0	0	30
DL	Low temperature / Darkness	PG	Pc	0	0	0	0	0	30
DL	Low temperature / Darkness	PF	Pa	0	0	0	0	0	30
DL	Low temperature / Darkness	PF	Pa	0	0	0	0	0	30
DL	Low temperature / Darkness	PF	Pa	0	0	0	0	0	30
DL	Low temperature / Darkness	PF	Pb	0	0	0	0	0	30
DL	Low temperature / Darkness	PF	Pb	0	0	0	0	0	30
DL	Low temperature / Darkness	PF	Pb	0	0	0	0	0	30
DL	Low temperature / Darkness	PG	Lc	0	0	0	0	0	30
DL	Low temperature / Darkness	PG	Lc	0	0	0	0	0	30
DL	Low temperature / Darkness	PG	Lc	0	0	0	0	0	30
DL	Low temperature / Darkness	PF	Ld	0	0	0	0	0	30
DL	Low temperature / Darkness	PF	Ld	0	0	0	0	0	30
DL	Low temperature / Darkness	PF	Ld	0	0	0	0	0	30
DL	Low temperature / Darkness	PF	Af	0	0	60	10	22	30
DL	Low temperature / Darkness	PF	Af	0	0	35	10	13	30
DL	Low temperature / Darkness	PF	Af	0	0	40	15	14	15
DL	Low temperature / Darkness	AB	As	0	0	35	10	15	15
DL	Low temperature / Darkness	AB	As	0	0	65	20	18	15
DL	Low temperature / Darkness	AB	As	0	0	40	10	20	15
DL	Low temperature / Darkness	AB	Dd	0	0	0	0	0	30
DL	Low temperature / Darkness	AB	Dd	0	0	0	0	0	30
DL	Low temperature / Darkness	AB	Dd	0	0	0	0	0	30
DL	Low temperature / Darkness	PF	Mr	0	0	10	5	1	30
DL	Low temperature / Darkness	PF	Mr	0	0	10	5	1	30
DL	Low temperature / Darkness	PF	Mr	0	0	5	5	1	30
DL	Low temperature / Darkness	PF	Tp	0	0	0	0	0	30
DL	Low temperature / Darkness	PF	Tp	0	0	0	0	0	30
DL	Low temperature / Darkness	PF	Tp	0	0	0	0	0	30
DL	Low temperature / Darkness	AB	Ce	0	0	0	0	0	30
DL	Low temperature / Darkness	AB	Ce	0	0	0	0	0	30
DL	Low temperature / Darkness	AB	Ce	0	0	0	0	0	30
	treatment
	High temperature / Darkness
	High temperature / Photoperiod
	Low temperature / Darkness
	Low temperature / Photoperiod
	High temperature / Darkness
	High temperature / Photoperiod
	Low temperature / Darkness
	Low temperature / Photoperiod
	High temperature / Darkness
	High temperature / Photoperiod
	Low temperature / Darkness
	Low temperature / Photoperiod
	High temperature / Darkness
	High temperature / Photoperiod
	Low temperature / Darkness
	Low temperature / Photoperiod
